# Supplementary material for: Antiviral drugs prolong survival in murine recessive dystrophic epidermolysis bullosa
Source: PubMed Central journal article supplement (PMC11018630; doi:10.1038/s44321-024-00048-8), 2024-03-10
Supplement: 44321_2024_48_MOESM1_ESM.pdf [file 44321_2024_48_MOESM1_ESM.pdf]

**Appendix Table of Content**

Appendix Figure S1. Visual of matrix detachment.....2

Appendix Figure S2. Antivirals screen identifies new targets for fibrosis prevention in RDEB.....3

Appendix Figure S3. Concentration curve for antiviral hits.....4

Appendix Figure S4. Antivirals do not affect non-EB matrix detachment or proliferation.....5

Appendix Figure S5. No impact on collagen processing enzymes with treatment.....6

Appendix Table S1. 43 compounds that delayed detachment.....7

Appendix Table S2. 32 antivirals that delayed detachment.....8

Appendix Table S3. Patient cells used in this study.....9

### Matrix Detachment

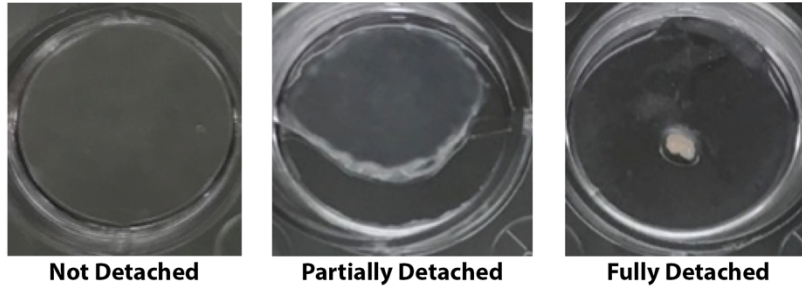

**Appendix Figure S1. Visual of matrix detachment.** Matrices in the process of detachment, from formed but attached, to partially detached from the well, and full detachment from the well.

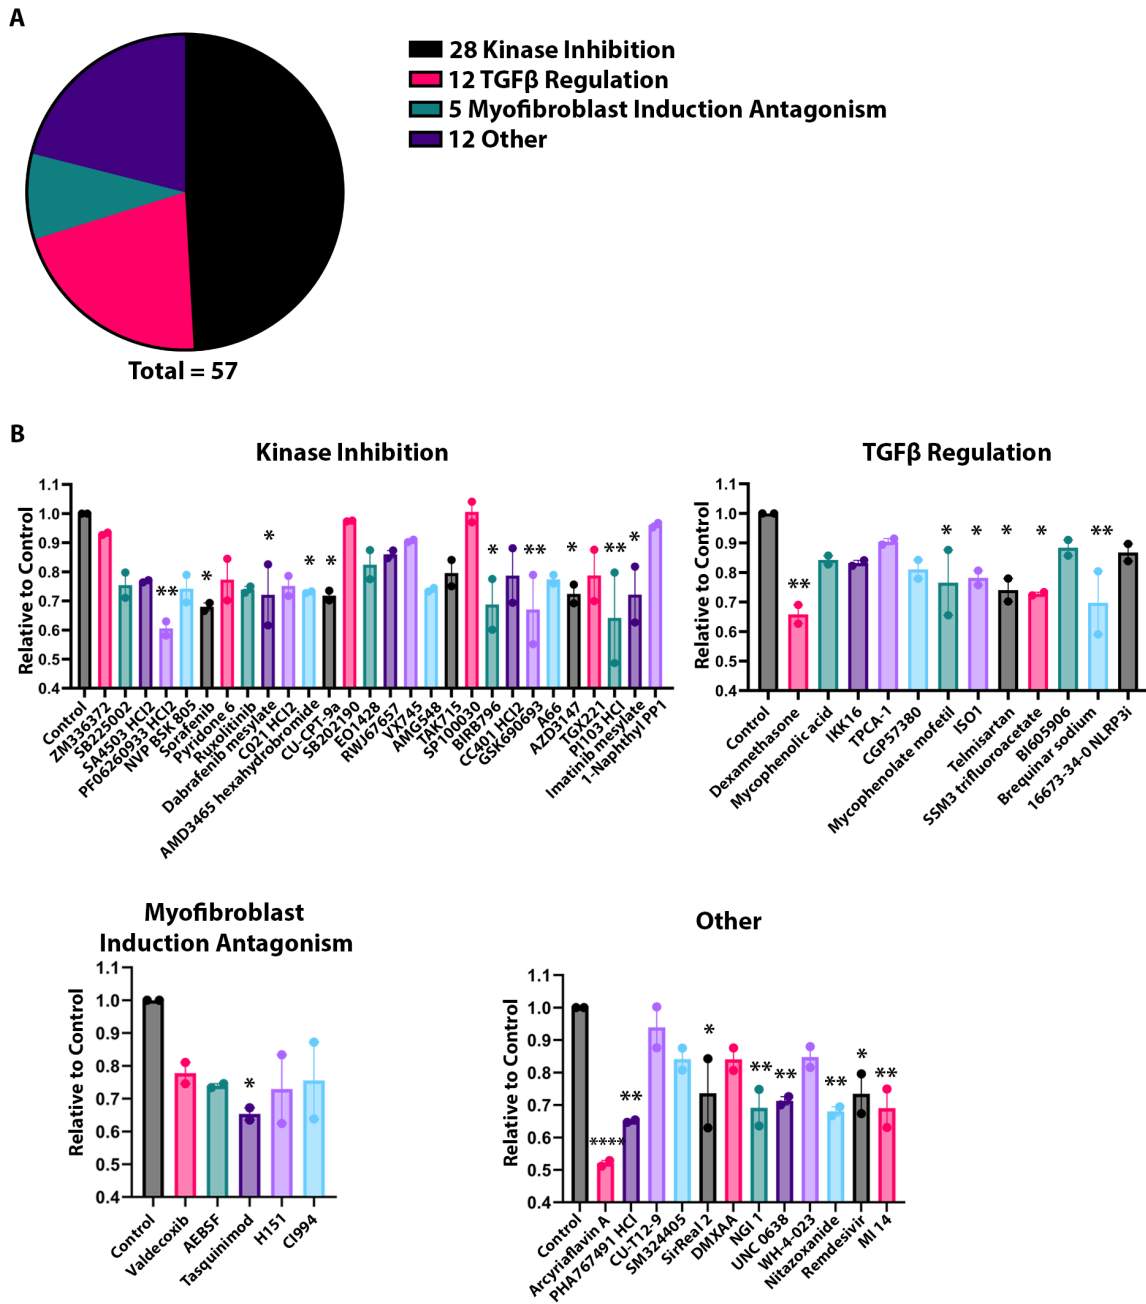

**Appendix Figure S2. Antivirals screen identifies new targets for fibrosis prevention in RDEB. (A)** Pie chart visual showing drug class hit-targets for the 57 of the 240 antiviral compounds that decreased time to detachment in two RDEB populations matrix assays compared to DMSO vehicle control. **(B)** Graphs showing mean  $\pm$  SEM of viability for all 57 compound hits that delayed detachment relative to DMSO control in both RDEB patient populations (n=2 biological replicates) stratified by drug class shown in (A). For all panels, one-way ANOVA performed with Dunnett correction for significance: \*p<0.05; \*\*p<0.01; \*\*\*\*p<0.0001.

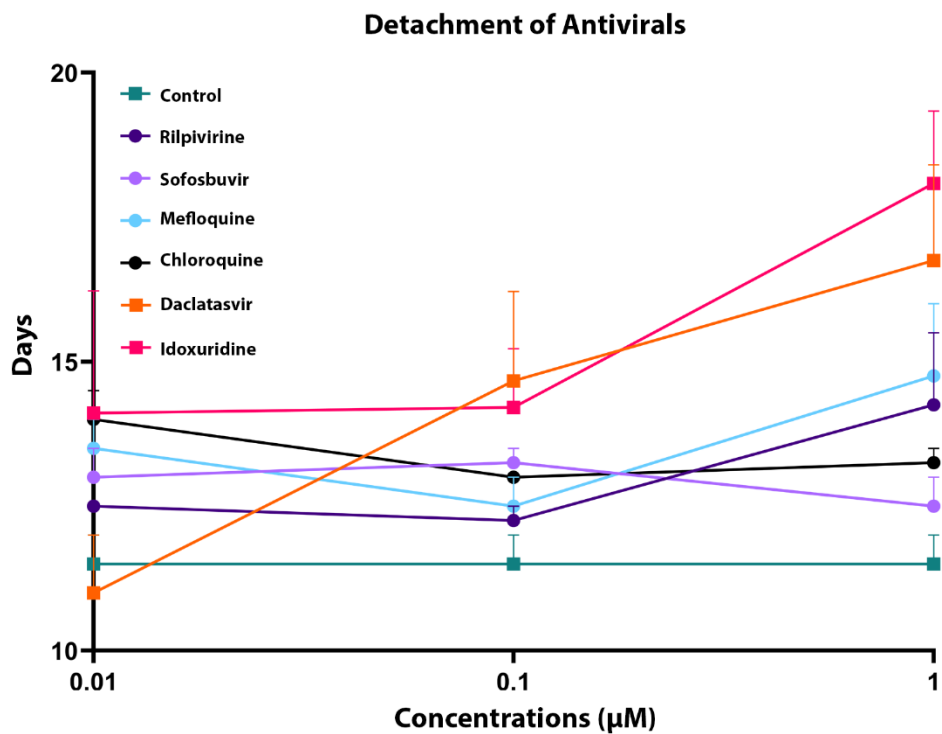

**Appendix Figure S3. Concentration curve for antiviral hits.** Time-concentration curve of RDEB matrix with vehicle control, rilpivirine, sofosbuvir, mefloquine, chloroquine, daclatasvir, and idoxuridine (n=2 biological replicates, mean±SEM). Ordinary one-way ANOVA with Dunnett test performed for significance, ns:  $p \geq 0.05$ .

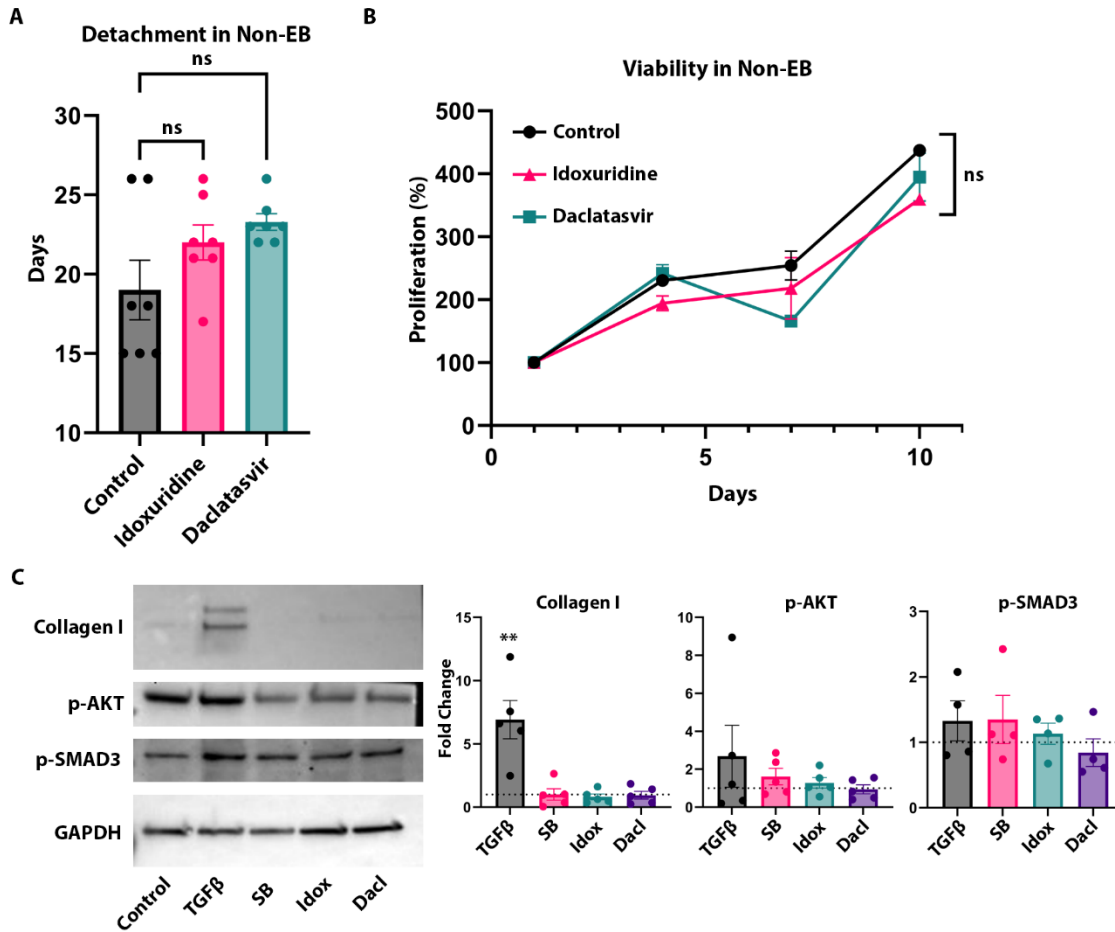

**Appendix Figure S4. Antivirals do not affect non-EB matrix detachment or proliferation.** (A) Graph showing mean  $\pm$  SEM of time to matrix detachment in non-EB fibroblast populations comparing vehicle control (n=7, 2 biological replicates in 3-4 technical replicates) to idoxuridine (n=7, 2 biological replicates in 3-4 technical replicates) and daclatasvir (n=7, 2 biological replicates in 3-4 technical replicates) treatment. Kruskal-Wallis test with Dunn's correction performed for significance. (B) Line graph showing mean  $\pm$  SEM of non-EB cell proliferation as a percentage compared to Day 1 with vehicle control (n=4, 2 biological replicates in duplicate), idoxuridine (n=4, 2 biological replicates in duplicate), and daclatasvir (n=4, 2 biological replicates in duplicate). Ordinary one-way ANOVA with Dunnett test performed. For both panels, ns:  $p \geq 0.05$ . (C) Western blots of collagen I, p-AKT, p-SMAD3, and GAPDH in non-EB fibroblasts with exogenous TGF $\beta$ , SB431542, idoxuridine, and daclatasvir treatment (left) and quantification of blots presented as graphs showing mean  $\pm$  SEM of collagen I (n=5 biological replicates), p-AKT (n=5 biological replicates), and p-SMAD3 (n=4 biological replicates) relative to GAPDH and quantified as fold change over DMSO vehicle control. RM one-way ANOVA with Friedman test for p-AKT, p-SMAD3, and collagen I; \*\* $p < 0.01$ ,  $p > 0.05$  is not significant (ns).

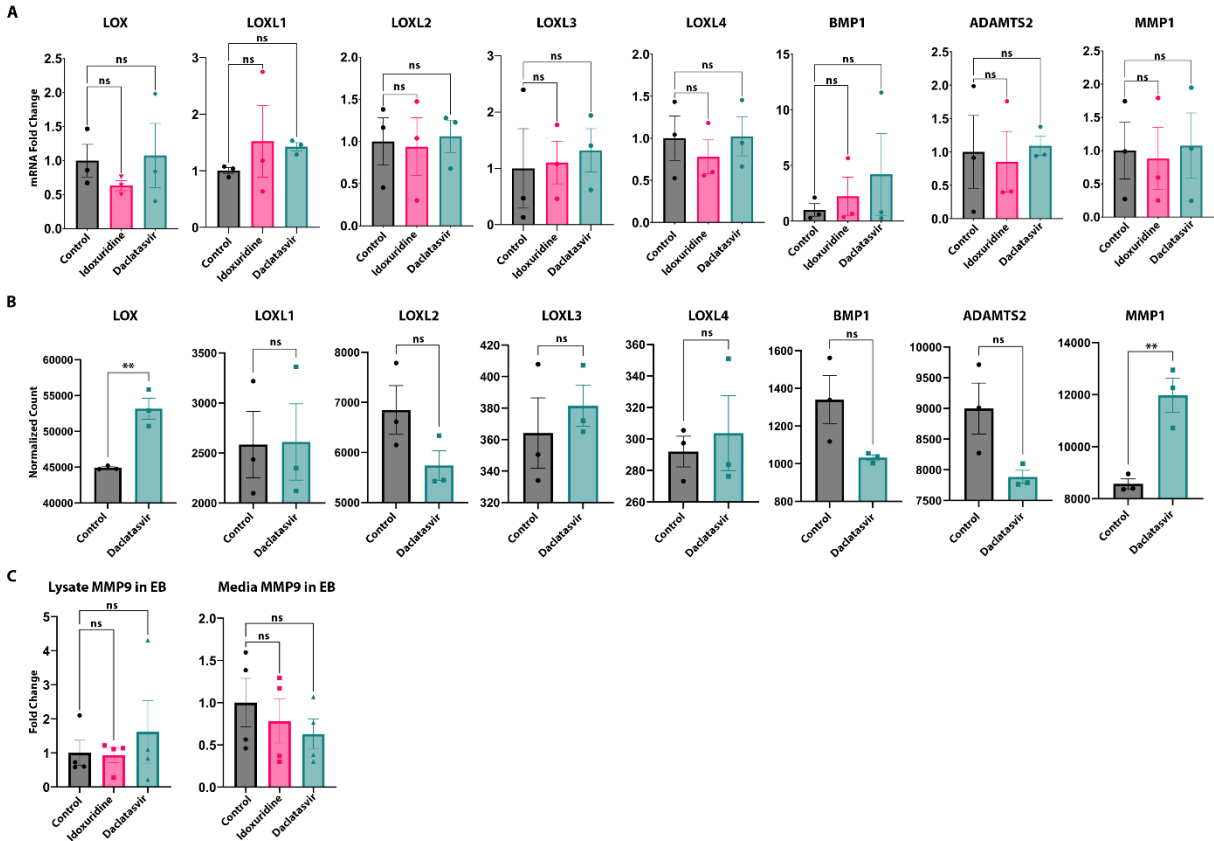

**Appendix Figure S5. No impact on collagen processing enzymes with treatment.** (A) Graphs showing mean  $\pm$  SEM of mRNA quantification of LOX, LOXL1-4, BMP1, ADAMTS2, and MMP1 for vehicle control, idoxuridine, and daclatasvir-treated EB fibroblasts ( $n=3$  biological replicates) relative to untreated. One-way ANOVA performed with Dunnett correction for significance, ns:  $p \geq 0.05$ . (B) Graphs showing mean  $\pm$  SEM of normalized counts DESeq2 from RNA sequencing of LOX, LOXL1-4, BMP1, ADAMTS2, and MMP1 for vehicle control and daclatasvir-treated EB fibroblasts (1 biological replicate in triplicate). Unpaired t-test performed for significance, \*\* $p < 0.01$ ; ns:  $p \geq 0.05$ . (C) Graphs showing mean  $\pm$  SEM of ELISA protein levels of MMP9 in lysate and media for vehicle control, idoxuridine, and daclatasvir-treated EB fibroblasts ( $n=4$  biological replicates) relative to untreated. One-way ANOVA performed with Dunnett correction for significance,  $p > 0.05$  is not significant (ns).

|                                       |                                           |
|---------------------------------------|-------------------------------------------|
| Adapalene                             | Halcinonide                               |
| Alprostadil                           | Idelalisib (CAL-101, GS-1101)             |
| Amoxapine                             | Idoxuridine                               |
| Aprepitant                            | Lapatinib                                 |
| Beclomethasone dipropionate           | Lapatinib (GW-572016) Ditosylate          |
| Betamethasone                         | Manidipine                                |
| Betamethasone Dipropionate            | Mefloquine HCl                            |
| Betamethasone Valerate                | Pimobendan                                |
| Budesonide                            | Promethazine HCl                          |
| Chlormadinone acetate                 | Resveratrol                               |
| Chloroquine Phosphate                 | Rilpivirine                               |
| Cyclosporine                          | Ripasudil (K-115) hydrochloride dihydrate |
| Daclatasvir (BMS-790052)              | Ruxolitinib (INCB018424)                  |
| Deferasirox                           | Sofosbuvir (PSI-7977, GS-7977)            |
| Desonide                              | Solifenacin succinate                     |
| Dexamethasone (DHAP)                  | Thioridazine HCl                          |
| Dexamethasone Acetate                 | Tioxolone                                 |
| Dextromethorphan hydrobromide hydrate | Tolvaptan                                 |
| Eltrombopag Olamine                   | Triamcinolone Acetonide                   |
| Fluocinolone Acetonide                | Vitamin D3                                |
| Fluticasone propionate                | Vorapaxar                                 |
| Fluvoxamine maleate                   |                                           |

**Appendix Table S1. 43 compounds that delayed detachment.**

|                         |                   |
|-------------------------|-------------------|
| ZM 336372               | TGX 221           |
| SB 225002               | 1-Naphthyl PP1    |
| SA 4503 dihydrochloride | Mycophenolic acid |
| NVP BSK 805             | IKK 16            |
| Pyridone 6              | TPCA-1            |
| Ruxolitinib             | CGP 57380         |
| C 021 dihydrochloride   | BI 605906         |
| SB 202190               | 16673-34-0 NLRP3i |
| EO 1428                 | Valdecoxib        |
| RWJ 67657               | AEBSF             |
| VX 745                  | H 151             |
| AMG 548                 | CI 994            |
| TAK 715                 | CU-T12-9          |
| SP 100030               | SM 324405         |
| CC 401 dihydrochloride  | DMXAA             |
| A66                     | WH-4-023          |

**Appendix Table S2. 32 antivirals that delayed detachment.**



| <b>Patient</b>    | <b>Cell Name</b> | <b>COL7A1 Mutation</b>                         | <b>Figure Reference</b>                                 |
|-------------------|------------------|------------------------------------------------|---------------------------------------------------------|
| Breast reduction  | BR23             | Wild type                                      | 1E,4E                                                   |
| Breast reduction  | BR30             | Wild type                                      | 1A, 1D                                                  |
| Breast reduction  | BR31             | Wild type                                      | 1E, 1F, 1I, 4E, AF4B                                    |
| Breast reduction  | BR44             | Wild type                                      | 1A, 1D                                                  |
| Breast reduction  | BR47             | Wild type                                      | 4E                                                      |
| Breast reduction  | BR49             | Wild type                                      | 1A, 1D                                                  |
| Breast reduction  | BR51             | Wild type                                      | 1A, 1D                                                  |
| Breast reduction  | BR52             | Wild type                                      | 1A, 1D                                                  |
| Breast reduction  | BR59             | Wild type                                      | 4E                                                      |
| Breast reduction  | BR61             | Wild type                                      | 1F, AF4C                                                |
| Breast reduction  | BR62             | Wild type                                      | 1A, 1D                                                  |
| Breast reduction  | BR71             | Wild type                                      | 1E, 1F, 1I, 4E, AF4B, AF4C                              |
| Breast reduction  | BR73             | Wild type                                      | 1A, 1F, 1I                                              |
| Breast reduction  | BR76             | Wild type                                      | AF4A                                                    |
| Breast reduction  | BR81             | Wild type                                      | 1F, AF4C                                                |
| Breast reduction  | BR82             | Wild type                                      | 1A, 1D                                                  |
| Breast reduction  | BR84             | Wild type                                      | AF4A                                                    |
| Breast reduction  | BR87             | Wild type                                      | AF4C                                                    |
| Breast reduction  | BR92             | Wild type                                      | 1F,4E, AF4C                                             |
| Severe RDEB       | EB70             | c.425 A>G, p.K142R /<br>c.425 A>G, p.K142R     | 1B, 1C                                                  |
| Severe RDEB       | EB71             | IVS34-1G>A; (+/-)<br>3840delC                  | 1A, 1B, 1C, 1F, 1I, 3A, 3C-K,<br>4A, 4C, 4D, AF5A, AF5C |
| Intermediate RDEB | EB73             | c.2471dupG / c.2471dupG                        | 1F, 1I, 4C, 4D, AF5A, AF5B                              |
| Severe RDEB       | EB75             | Sequencing in progress                         | 1B, 1C, 1F, 1G, 4F                                      |
| Intermediate RDEB | EB80             | c.2471dupG / c.2471dupG                        | 1A, 1B, 1C, 1E, 1F, 1G, 4B,<br>4F                       |
| Severe RDEB       | EB83             | c.C4373T:p.P1458L /<br>c.5772p1delG            | 1A, 4A                                                  |
| Intermediate RDEB | EB85             | c.2044C>T:p.R682X /<br>c.6101G>C: p.G2034A     | 1A, 1B, 1C, 1E, 1F, 1G, 4B,<br>4F                       |
| Severe RDEB       | EB99             | c.6527dupC and<br>c.5532+1G>T                  | 1H                                                      |
| Severe RDEB       | EB101            | c.2005C>T/c.2005C>T                            | 1H                                                      |
| Severe RDEB       | EB102            | c.8440C>T /c.8440C>T                           | 1H                                                      |
| Severe RDEB       | EB103            | Sequencing in progress                         | 1E, 1H, 4B, 4E                                          |
| Severe RDEB       | EB104            | Sequencing in progress                         | 1A, 1H, 4A, 4D                                          |
| Severe RDEB       | EB118            | c.1732C>T:p.R578X /<br>c.7474C>T: p.<br>R2492X | 1E, 4B, 4E                                              |

|                   |       |                                                         |                                                                           |
|-------------------|-------|---------------------------------------------------------|---------------------------------------------------------------------------|
| Intermediate RDEB | EB119 | c.5565_5568delinsA / c.6527insC:p.G2177WfsX113          | 1A, 1E, 1F, 2A, 2B, 2C, 2D, 3B, 3C-K, 4A, 4B, 4C, 4D, 4E, AF2, AF5A, AF5C |
| Severe RDEB       | EB121 | c.1732C>T: p.R578X / c.7786delG: p.G2596VfsX33          | 1A, 2E, 2F, 4A, AF2, AF3, AF5C                                            |
| Severe RDEB       | EB123 | c.6527insC: p.G2177WfsX113 / c.6527insC: p.G2177WfsX113 | 1E, 2E, 2F, 4E                                                            |
| Severe RDEB       | EB126 | Sequencing in progress                                  | 1F,4C, 1I                                                                 |
| Severe RDEB       | EB135 | Sequencing in progress                                  | AF5C                                                                      |

**Appendix Table S3. Patient cells used in this study.**
