# Supplementary material for: Antiviral drugs prolong survival in murine recessive dystrophic epidermolysis bullosa
Source: PubMed Central journal article supplement (PMC11018630; doi:10.1038/s44321-024-00048-8), 2024-03-10
Supplement: 44321_2024_48_MOESM7_ESM.pdf [file 44321_2024_48_MOESM7_ESM.pdf]

# Antiviral drugs prolong survival in murine recessive dystrophic epidermolysis bullosa

Grace Tartaglia, Ignacia Fuentes, Neil Patel, Abigail Varughese, Lauren Israel, Pyung Hun Park, Michael Alexander, Shiv Poojan, Qingqing Cao, Brenda Solomon, Zachary Padron, Jonathan Dyer, Jemima Mellerio, John McGrath, Francis Palisson, Julio Salas-Alanis, Lin Han, and Andrew South

*Corresponding authors: Andrew South (andrew.south@jefferson.edu) , Grace Tartaglia (grace.tartaglia@jefferson.edu)*

---

## Review Timeline:

|                     |             |
|---------------------|-------------|
| Submission Date:    | 30th Sep 23 |
| Editorial Decision: | 24th Oct 23 |
| Revision Received:  | 26th Jan 24 |
| Editorial Decision: | 9th Feb 24  |
| Revision Received:  | 16th Feb 24 |
| Accepted:           | 19th Feb 24 |

---

*Editor: Zeljko Durdevic*

## Transaction Report:

(Note: With the exception of the correction of typographical or spelling errors that could be a source of ambiguity, letters and reports are not edited. Depending on transfer agreements, referee reports obtained elsewhere may or may not be included in this compilation. Referee reports are anonymous unless the Referee chooses to sign their reports.)

24th Oct 2023

Dear Dr. South,

Thank you for the submission of your manuscript to EMBO Molecular Medicine. We have now received feedback from the three reviewers who agreed to evaluate your manuscript. All three referees recognize potential interest of the study but also raise important criticism that should be addressed in a major revision. If you would like to discuss further the points raised by the referees, I am available to do so via email or video. Let me know if you are interested in this option.

Further consideration of a revision that addresses reviewers' concerns in full will entail a second round of review. EMBO Molecular Medicine encourages a single round of revision only and therefore, acceptance or rejection of the manuscript will depend on the completeness of your responses included in the next, final version of the manuscript. For this reason, and to save you from any frustrations in the end, I would strongly advise against returning an incomplete revision.

We would welcome the submission of a revised version within three months for further consideration. Please let us know if you require longer to complete the revision.

I look forward to receiving your revised manuscript.

Yours sincerely,

Zeljko Durdevic

Zeljko Durdevic  
Editor  
EMBO Molecular Medicine

\*\*\*\*\*

When submitting your revised manuscript, please carefully review the instructions that follow below. We perform an initial quality control of all revised manuscripts before re-review; failure to include requested items will delay the evaluation of your revision.

We require:

- 1) A .docx formatted version of the manuscript text (including legends for main figures, EV figures and tables). Please make sure that the changes are highlighted to be clearly visible.
- 2) Individual production quality figure files as .eps, .tif, .jpg (one file per figure). For guidance, download the 'Figure Guide PDF': (<https://www.embopress.org/page/journal/17574684/authorguide#figureformat>).
- 3) A .docx formatted letter INCLUDING the reviewers' reports and your detailed point-by-point responses to their comments. As part of the EMBO Press transparent editorial process, the point-by-point response is part of the Review Process File (RPF), which will be published alongside your paper.
- 4) A complete author checklist, which you can download from our author guidelines (<https://www.embopress.org/page/journal/17574684/authorguide#submissionofrevisions>). Please insert information in the checklist that is also reflected in the manuscript. The completed author checklist will also be part of the RPF.
- 5) Please note that all corresponding authors are required to supply an ORCID ID for their name upon submission of a revised manuscript.
- 6) It is mandatory to include a 'Data Availability' section after the Materials and Methods. Before submitting your revision, primary datasets produced in this study need to be deposited in an appropriate public database, and the accession numbers and

database listed under 'Data Availability'. Please remember to provide a reviewer password if the datasets are not yet public (see <https://www.embopress.org/page/journal/17574684/authorguide#dataavailability>).

In case you have no data that requires deposition in a public database, please state so in this section. Note that the Data Availability Section is restricted to new primary data that are part of this study.

7) For data quantification: please specify the name of the statistical test used to generate error bars and P values, the number (n) of independent experiments (specify technical or biological replicates) underlying each data point and the test used to calculate p-values in each figure legend. The figure legends should contain a basic description of n, P and the test applied. Graphs must include a description of the bars and the error bars (s.d., s.e.m.). See also 'Figure Legend' guidelines: <https://www.embopress.org/page/journal/17574684/authorguide#figureformat>

8) At EMBO Press we ask authors to provide source data for the main manuscript figures. Our source data coordinator will contact you to discuss which figure panels we would need source data for and will also provide you with helpful tips on how to upload and organize the files.

9) Our journal encourages inclusion of \*data citations in the reference list\* to directly cite datasets that were re-used and obtained from public databases. Data citations in the article text are distinct from normal bibliographical citations and should directly link to the database records from which the data can be accessed. In the main text, data citations are formatted as follows: "Data ref: Smith et al, 2001" or "Data ref: NCBI Sequence Read Archive PRJNA342805, 2017". In the Reference list, data citations must be labeled with "[DATASET]". A data reference must provide the database name, accession number/identifiers and a resolvable link to the landing page from which the data can be accessed at the end of the reference. Further instructions are available at .

10) We replaced Supplementary Information with Expanded View (EV) Figures and Tables that are collapsible/expandable online. A maximum of 5 EV Figures can be typeset. EV Figures should be cited as 'Figure EV1, Figure EV2" etc... in the text and their respective legends should be included in the main text after the legends of regular figures.

- For the figures that you do NOT wish to display as Expanded View figures, they should be bundled together with their legends in a single PDF file called \*Appendix\*, which should start with a short Table of Content. Appendix figures should be referred to in the main text as: "Appendix Figure S1, Appendix Figure S2" etc.

- Additional Tables/Datasets should be labeled and referred to as Table EV1, Dataset EV1, etc. Legends have to be provided in a separate tab in case of .xls files. Alternatively, the legend can be supplied as a separate text file (README) and zipped together with the Table/Dataset file.

See detailed instructions here:

11) The paper explained: EMBO Molecular Medicine articles are accompanied by a summary of the articles to emphasize the major findings in the paper and their medical implications for the non-specialist reader. Please provide a draft summary of your article highlighting

- the medical issue you are addressing,
- the results obtained and
- their clinical impact.

This may be edited to ensure that readers understand the significance and context of the research. Please refer to any of our published articles for an example.

12) For more information: There is space at the end of each article to list relevant web links for further consultation by our readers. Could you identify some relevant ones and provide such information as well? Some examples are patient associations, relevant databases, OMIM/proteins/genes links, author's websites, etc...

13) Author contributions: You will be asked to provide CRediT (Contributor Role Taxonomy) terms in the submission system. These replace a narrative author contribution section in the manuscript.

14) A Conflict of Interest statement should be provided in the main text.

15) Every published paper now includes a 'Synopsis' to further enhance discoverability. Synopses are displayed on the journal

webpage and are freely accessible to all readers. They include a short stand first (maximum of 300 characters, including space) as well as 2-5 one-sentences bullet points that summarizes the paper. Please write the bullet points to summarize the key NEW findings. They should be designed to be complementary to the abstract - i.e. not repeat the same text. We encourage inclusion of key acronyms and quantitative information (maximum of 30 words / bullet point). Please use the passive voice. Please attach these in a separate file or send them by email, we will incorporate them accordingly.

Please also suggest a striking image or visual abstract to illustrate your article as a PNG file 550 px wide x 300-600 px high.

EMBO Molecular Medicine has a "scooping protection" policy, whereby similar findings that are published by others during review or revision are not a criterion for rejection. Should you decide to submit a revised version, I do ask that you get in touch after three months if you have not completed it, to update us on the status.

Please note: When submitting your revision you will be prompted to enter your funding and payment information. This will allow Wiley to send you a quote for the article processing charge (APC) in case of acceptance. This quote takes into account any reduction or fee waivers that you may be eligible for. Authors do not need to pay any fees before their manuscript is accepted and transferred to the publisher.

EMBO Press participates in many Publish and Read agreements that allow authors to publish Open Access with reduced/no publication charges. Check your eligibility: <https://authorservices.wiley.com/author-resources/Journal-Authors/open-access/affiliation-policies-payments/index.html>

\*\*\*\*\* Reviewer's comments \*\*\*\*\*

Referee #1 (Remarks for Author):

Dystrophic epidermolysis bullosa (DEB) is a devastating genetic disorder associated with fibrotic scarring. Tartaglia et al. used a novel in vitro model based on endogenously produced extracellular matrix to screen an FDA-approved compound library and identified antivirals as a drug class not yet known for anti-fibrotic action. Their lead drug candidate, daclatasvir, was then evaluated in a mouse model of DEB, where it increased survival of affected animals and mitigated the disease phenotype. Daclatasvir had been approved for clinical use in combination with other antiviral agents as therapy of chronic hepatitis C, but was withdrawn by the sponsor in 2019. However, Tartaglia et al. also screened a focused 240 antiviral drug library and report 57 hits across two DEB dermal fibroblast populations that delayed matrix detachment. Overall, the paper presents a solid set of data, adding something new and relevant to the field of epidermolysis bullosa research. The results support clinical development of antivirals not only for the treatment of DEB but may also pave the way to tackle the burden of other fibrotic diseases.

The following comments need to be addressed to improve the manuscript:

1. What does Supplemental Fig. 2 show? The PDF lacks a legend with relevant information, e.g., which controls were used.
2. The authors describe the effects of numerous compounds on DEB fibroblasts. That disease phenotype serves as control throughout the paper. It would also be interesting to know what happens if selected compounds are applied to wild-type dermal fibroblasts, and the respective data for two compounds are actually reported in Supplemental Fig. 4. Have the authors looked at this more systematically? Any effect that is seen also on wild-type fibroblasts would be more than a rescue effect!
3. Why did the authors investigate only individual mRNAs by qPCR? Results of a complete array would have provided relevant additional information.
4. Clarity for the nonspecialist reader could be improved, especially in the results section.

Referee #2 (Comments on Novelty/Model System for Author):

There is a huge unmet need to treat fibrosis in RDEB.  
They included a diverse range of RDEB patient and mouse samples.  
They tested a large range of molecules with the assay.

Referee #2 (Remarks for Author):

This study developed assays to assess fibrosis and TGFB in RDEB  
Please explain any relation between elevated basic FGF found in RDEB and the TGFB and fibrosis  
Do these drugs that reduce fibrosis impact basic FGF as this also stimulates fibrosis?  
How was quality of life measured in these mice?

Referee #3 (Remarks for Author):

In the manuscript "Antiviral drugs prolong survival in murine recessive dystrophic epidermolysis bullosa" Tartaglia and colleagues describe a screen of FDA approved drugs to identify compounds to be used in RDEB, a skin fragility disorder characterized by high level of fibrosis. As readout they use an in vitro system i.e., the detachment of cell matrices from culture plates. Anti-viral drugs have a positive effect in vitro, reduce fibrosis characteristics, and two lead compounds are further characterized. Finally, the best scoring compound daclatasvir is tested in a preclinical mouse model and has positive effects on fibrosis, life quality and span.

This is an interesting and well written manuscript that follows a trend observable in the last years: the repurposing of drugs to treat rare diseases for which no causal therapies are available. The findings are interesting and promise a swift translation, addressing an important and unmet clinical need. With respect to the presented data several questions remain which should be addressed prior publication.

Major concerns:

- (1) The screen data should be made publicly available in form of a supplemental excel spreadsheet. How were selections made? Right now, one cannot recapitulate how drugs were selected and which quantitative measures/cutoffs and/or statistics were used to define targets. This is absolutely critical so that readers can perform their own statistical analyses (which may yield different shortlists).
- (2) I cannot follow the logic of hydroxyproline measurements (Figure 1I and 4F). What is the major conclusion of these experiments and how does this relate to literature knowledge? When there is more hydroxyproline in the medium of non-EB cells does it mean that there is more secreted/soluble collagen? This is contradicting the fibrosis phenotype. Authors should perform additional tests e.g., western blots or proteomics to directly address collagen levels in medium. Hydroxyproline is just a proxy and may be present in other proteins or in a free form. It could also indicate a difference in collagen crosslinking and reflect hydroxyproline accessibility (more than collagen amount as misleadingly indicated by the axis labels). Also, axis labels should be corrected and indicate the actual measurement.
- (3) Used drug concentrations in screen: how do the 10<sup>-6</sup> M relate to clinical relevant concentrations? Are drugs prescribed in a similar range, are serum levels in a similar range?
- (4) Figure 4D: data spread of controls should be considered. It appears that control values have been set/normalized to 1. If this is done before significance testing, most changes might wrongly appear significant.

Minor points:

- (1) In Figure 4A, 1<sup>-6</sup> M of daclatasvir seems to have not a significant effect, in contrast to Figure 4B. How are these two figure panels related? How is the difference explained?
- (2) In the discussion a Figure 4H with AFM data is mentioned which is not included in the manuscript. This should be corrected. It would be interesting to compare AFM measurements of EB and non-EB matrices.

*Referee #1 (Remarks for Author):*

*Dystrophic epidermolysis bullosa (DEB) is a devastating genetic disorder associated with fibrotic scarring. Tartaglia et al. used a novel in vitro model based on endogenously produced extracellular matrix to screen an FDA-approved compound library and identified antivirals as a drug class not yet known for anti-fibrotic action. Their lead drug candidate, daclatasvir, was then evaluated in a mouse model of DEB, where it increased survival of affected animals and mitigated the disease phenotype. Daclatasvir had been approved for clinical use in combination with other antiviral agents as therapy of chronic hepatitis C, but was withdrawn by the sponsor in 2019. However, Tartaglia et al. also screened a focused 240 antiviral drug library and report 57 hits across two DEB dermal fibroblast populations that delayed matrix detachment. Overall, the paper presents a solid set of data, adding something new and relevant to the field of epidermolysis bullosa research. The results support clinical development of antivirals not only for the treatment of DEB but may also pave the way to tackle the burden of other fibrotic diseases.*

Reply: We thank the Reviewer for their thorough assessment of our manuscript and we are very happy that the Reviewer appreciates the novelty and clinical potential of our findings. We appreciate the Reviewer's recommendations which we have addressed as detailed below. We believe the additions and modifications suggested by the Reviewer have greatly improved our manuscript.

*The following comments need to be addressed to improve the manuscript:*

*1. What does Supplemental Fig. 2 show? The PDF lacks a legend with relevant information, e.g., which controls were used.*

Reply: We apologize for the oversight regarding the legend for **Supplemental Figure 2** which we agree was not adequately describing the data presented. We have replaced the legend for **Supplemental Figure 2** to clearly describe the data we are presenting and we thank the Reviewer for flagging this error.

*2. The authors describe the effects of numerous compounds on DEB fibroblasts. That disease phenotype serves as control throughout the paper. It would also be interesting to know what happens if selected compounds are applied to wild-type dermal fibroblasts, and the respective data for two compounds are actually reported in Supplemental Fig. 4. Have the authors looked at this more systematically? Any effect that is seen also on wild-type fibroblasts would be more than a rescue effect!*

Reply: We agree with the Reviewer that it is important to determine whether antivirals represent an active process in the absence of a disease phenotype. As the Reviewer pointed out we had looked at our lead hit compounds in normal, wild-type, fibroblasts in **Supplemental Figure 4**. We have now added Western blotting data to confirm that our lead antiviral hit compounds do not affect Collagen I, phosphorylated SMAD3 or Akt at the protein level (new **Supplemental Figure 4**).

*3. Why did the authors investigate only individual mRNAs by qPCR? Results of a complete array would have provided relevant additional information.*

Reply: We thank the reviewer for the suggestion of running a complete array to look at the effects of daclatasvir and idoxuridine on RDEB fibroblasts. In response, and in addition to our focused qPCR approach to assess collagen processing enzymes we have added RNA sequencing data comparing daclatasvir with vehicle control in RDEB fibroblasts. These new data agree with our observations that

daclatasvir reduces collagen I mRNA and has little effect on the collagen processing enzyme genes we originally presented in the old *Supplemental Figure 5*. We have added the RNA sequencing data to the new *Supplemental Figure 5*.

*4. Clarity for the nonspecialist reader could be improved, especially in the results section.*

We have reviewed the results section and altered some of the text as indicated with a view to improve readability and explanation of our approach for the non-specialist reader. We hope these improvements adequately address this important comment.

*Referee #2 (Comments on Novelty/Model System for Author):*

*There is a huge unmet need to treat fibrosis in RDEB.  
They included a diverse range of RDEB patient and mouse samples.  
They tested a large range of molecules with the assay.*

Reply: We thank the Reviewer for their assessment of our manuscript and their appreciation of the range of compounds and breadth of samples used in our study.

*Referee #2 (Remarks for Author):*

*This study developed assays to assess fibrosis and TGFB in RDEB  
Please explain any relation between elevated basic FGF found in RDEB and the TGFB and fibrosis*

Reply: The Reviewer makes a very good point since FGF has been linked with fibrosis in non-RDEB settings and there is a study from the late 90's identifying increased FGF in urine of RDEB patients (Arbiser *et al*, 1998). Previously reported unbiased screens looking at gene expression or protein changes in RDEB fibroblasts compared to non-RDEB fibroblasts have not identified altered levels of FGF (Küttner *et al*, 2014; Küttner *et al*, 2013; Ng *et al*, 2012; Nyström *et al*, 2013) and this is the reason we had not previously looked at levels in our assays. These dermal fibroblast specific data would indicate a separate source for FGF in RDEB patients, perhaps muscle, connective tissues or the kidney itself since these tissues are reported to have relatively high levels of FG2 when reviewing the Protein Atlas (<https://www.proteinatlas.org/ENSG00000138685-FGF2/tissue>). However, the Reviewer makes an excellent suggestion and in response we have performed Western blotting to compare protein levels of FGF in RDEB and non-EB fibroblasts (**Figure R1**). These experiments found no significant change in fibroblast FGF2 protein levels comparing RDEB and non-EB; however, SB treatment significantly reduced FGF2 expression in EB while TGFβ increased FGF2 expression in non-EB, although this was not significant in the three populations of non-EB cells we analyzed. These data are in line with published studies identifying a relationship between TGFβ and FGF (Strand *et al*, 2014) but do not identify differences between RDEB and non-EB.

*Do these drugs that reduce fibrosis impact basic FGF as this also stimulates fibrosis?*

Reply: We thank the reviewer for their suggestion to look at the impact of antiviral treatment on FGF levels in RDEB fibroblasts. Western blotting experiments found no significant effect on FGF for our two lead hit antiviral compounds as shown (**Figure R2**).

*How was quality of life measured in these mice?*

Reply: Quality of life for the RDEB mice was measured using activity (more energy and less pain to move around – see **Figure 5B**), hair retention (a sign of diminished pruritus – see **Figure 5D**), and weight gain (increased appetite – see **Figure 5C**).



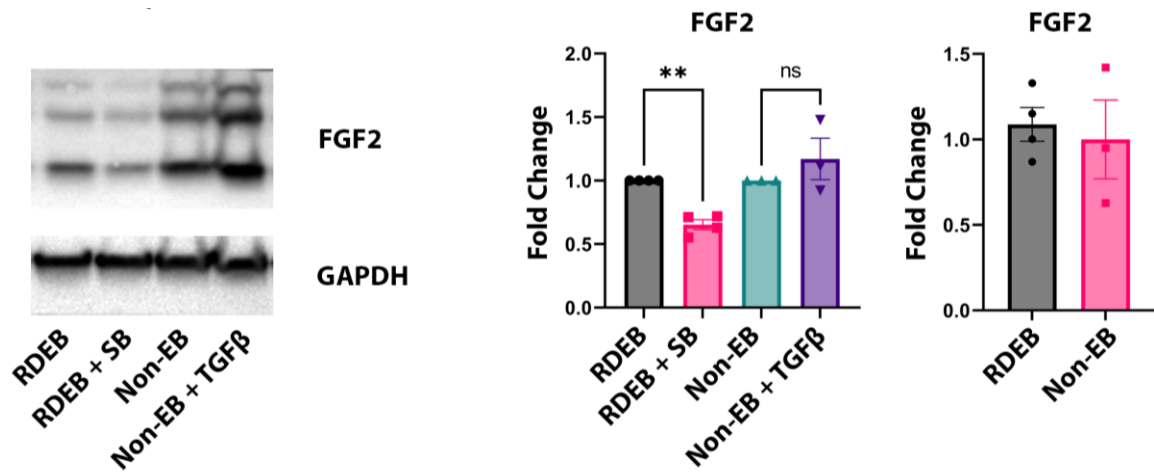

**Figure R1. TGFβ regulation impacts FGF2 expression but shows no difference between RDEB and non-EB.** (Left) Western blots of FGF2 and GAPDH in RDEB (n=4) and non-EB (n=3) fibroblasts with SB or TGFβ treatment. (Middle) Quantification of blot presented as graph showing mean ± SEM of FGF2 expression relative to GAPDH. Ordinary one-way ANOVA with Šidák test for significance. \*\*p<0.01; ns, not significant. (Right) Quantification of blot presented as graph showing mean ± SEM of FGF2 expression relative to GAPDH. Unpaired t-test for significance.

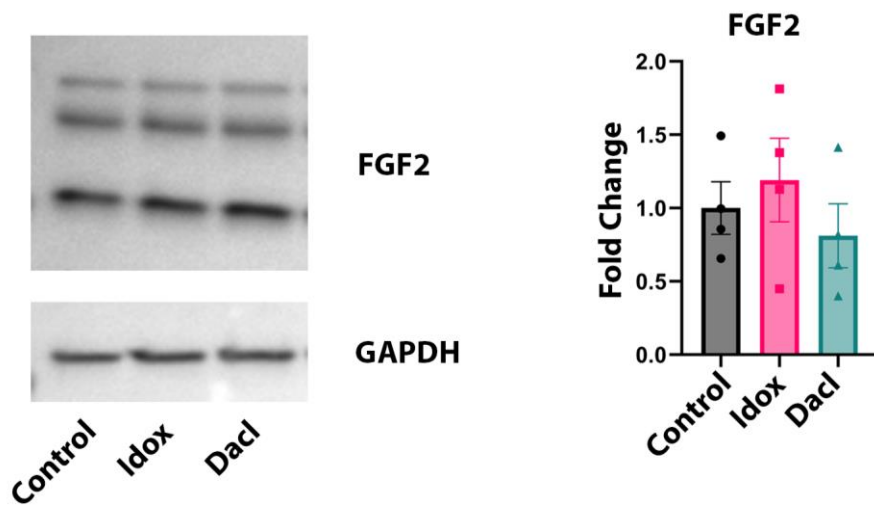

**Figure R2. Antivirals do not affect FGF2 expression in RDEB fibroblasts.** (Left) Western blots of FGF2 and GAPDH in RDEB fibroblasts (n=4) with vehicle control, idoxuridine, or daclatasvir treatment. (Right) Quantification of blot presented as graph showing mean ± SEM of FGF2 expression relative to GAPDH. RN one-way ANOVA for significance.

*Referee #3 (Remarks for Author):*

*In the manuscript "Antiviral drugs prolong survival in murine recessive dystrophic epidermolysis bullosa" Tartaglia and colleagues describe a screen of FDA approved drugs to identify compounds to be used in RDEB, a skin fragility disorder characterized by high level of fibrosis. As readout they use an in vitro system i.e., the detachment of cell matrices from culture plates. Anti-viral drugs have a positive effect in vitro, reduce fibrosis characteristics, and two lead compounds are further characterized. Finally, the best scoring compound daclatasvir is tested in a preclinical mouse model and has positive effects on fibrosis, life quality and span.*

*This is an interesting and well written manuscript that follows a trend observable in the last years: the repurposing of drugs to treat rare diseases for which no causal therapies are available. The findings are interesting and promise a swift translation, addressing an important and unmet clinical need.*

Reply: We thank the Reviewer for their astute and thorough review of our manuscript and we greatly appreciate the questions, comments and suggestions which we have endeavored to address below. We are happy that the Reviewer believes our study to be well written, interesting and have clinical value.

*With respect to the presented data several questions remain which should be addressed prior publication. Major concerns:*

*(1) The screen data should be made publicly available in form of a supplemental excel spreadsheet. How were selections made? Right now, one cannot recapitulate how drugs were selected and which quantitative measures/cutoffs and/or statistics were used to define targets. This is absolutely critical so that readers can perform their own statistical analyses (which may yield different shortlists).*

Reply: We thank the reviewer for their interest in our screen data and have provided a supplemental excel table as part of the **SourceData** for **Figure 3**, as required by the Journal. We have also added more details about our quantitative measures in the methods section in terms of how our selections were made. Essentially, the initial screen was performed in triplicate and the average number of days for detachment of the matrix was used to compare vehicle control. Those compounds that delayed detachment longer than 2 days after control were taken forward in the secondary screen. The screens were observational in nature and did not include statistics to define targets. We have added this detail to the manuscript.

*(2) I cannot follow the logic of hydroxyproline measurements (Figure 1I and 4F). What is the major conclusion of these experiments and how does this relate to literature knowledge? When there is more hydroxyproline in the medium of non-EB cells does it mean that there is more secreted/soluble collagen? This is contradicting the fibrosis phenotype. Authors should perform additional tests e.g., western blots or proteomics to directly address collagen levels in medium. Hydroxyproline is just a proxy and may be present in other proteins or in a free form. It could also indicate a difference in collagen crosslinking and reflect hydroxyproline accessibility (more than collagen amount as misleadingly indicated by the axis labels). Also, axis labels should be corrected and indicate the actual measurement.*

Reply: We appreciate the reviewers' questions regarding the hydroxyproline assay and we now attempt to provide further clarification in the manuscript. Our original major conclusions from the assay experiments were that 1) RDEB matrices retain a greater proportion of their collagen compared with non-EB matrices, in line with fibrosis in RDEB patients and accelerated detachment of RDEB matrices, 2) Stimulating or inhibiting TGF $\beta$  in non-EB or RDEB matrices (respectively) reverses the matrix retention trends, and 3) while the antivirals promoted the non-EB collagen retention phenotype in RDEB matrices, Idoxuridine

stimulated more collagen retention in non-EB matrices and that contributed to our decision not to pursue Idoxuridine to in vivo trials.

We agree and now acknowledge in the revised manuscript that hydroxyproline is indeed a surrogate for collagen since other proteins are hydroxylated at their proline residues (particularly proteins secreted by dermal fibroblasts (Küttner *et al.*, 2013). We also acknowledge that the measurements we present are not absolute values since the insolubility of collagen presents challenges for absolute values in the matrices and the stability of collagens and hydroxylated proline residues in the media over the seven days of the experiment will likely be influenced by multiple factors. We have added clarity to the manuscript to address these issues and we have altered the graph axis to reflect the actual measurements as requested. Collagen I levels in the matrix are presented throughout the manuscript and the consistent increase as a measure of fibrosis in our study is the level of collagen I in the matrix. Collagen secreted into the media is soluble and not processed into fibrils or other secondary structures and is subject to degradation by cells in culture and is not the focus of our study since we have used cells own ECM (matrix) detachment from tissue culture to identify antiviral drugs. We have previously published that although the level of collagen I is increased in RDEB, the secretion (measured as a ratio of intracellular to extracellular collagen) is unaltered(Cao *et al*, 2022). Other collagens do show changes in their secretion and intracellular retention, such as collagen 12, but how this relates to matrix composition and detachment is unknown. We feel that a proteomics study of secreted vs ECM retained collagen is beyond the scope of our study and we refer the Reviewer to the excellent work of Jorn Dengjel, Victoria Kuttner and colleagues who report on beautiful proteomics in RDEB and normal fibroblasts (Küttner *et al.*, 2014; Tölle & Dengjel, 2019).

*(3) Used drug concentrations in screen: how do the 10 µM relate to clinical relevant concentrations? Are drugs prescribed in a similar range, are serum levels in a similar range?*

We appreciate the Reviewer's point and agree that 10µM cannot be considered a clinically relevant concentration for all compounds since this will vary from compound to compound. For the purpose of a screen we started with 10µM and moved forward with our lead hits at 1µM. Our rationale for starting at a relatively high concentration was to avoid taking compounds that could potentially be toxic in the setting of RDEB since patients with RDEB suffer from failure to thrive and often are at weights associated with children, which would lead to increased drug exposure if taking a standard dose of an approved therapy. We wanted to make sure that we didn't pursue drugs with potential side effects in an already challenging clinical setting. For the animal work we do use a physiologically and clinical relevant dose in line with the dose used clinically for daclatasvir (Zakaria & El-Sisi, 2020).

*(4) Figure 4D: data spread of controls should be considered. It appears that control values have been set/normalized to 1. If this is done before significance testing, most changes might wrongly appear significant.*

Reply: We appreciate the Reviewer's comment that indeed normalizing controls to 1 has the potential to influence significance for certain datasets. In this instance we are analyzing the change in protein abundance comparing treatment with vehicle control using multiple patient primary populations of fibroblasts with Western blotting. Given that there is considerable variation in both baseline signal from separate populations as well as intensities of chemiluminescence, which itself does not always provide consistent values comparing different experiments, the appropriate way to measure change in protein abundance after treatment is to normalize the data to vehicle control. We consulted our local biostatistician, Dr. Tingting Zhan who confirmed that this approach is the correct practice for this type of

analysis. Our raw data is available for review in the **SourceData** associated with each figure as per journal policy.

*Minor points:*

(1) In Figure 4A, 1  $\mu$ M of daclatasvir seems to have not a significant effect, in contrast to Figure 4B. How are these two figure panels related? How is the difference explained?

Reply: We thank the reviewer for pointing out this discrepancy which was a result of completely separate experiments performed at very different times. The original experiments shown in the **old Figure 4A** were used to determine the best dose moving forward from the screen. 1 $\mu$ M was identified and taken forward, and the **old Figure 4B** confirmed that this dose indeed consistently delayed detachment in 6 separate RDEB populations, comparing to vehicle alone control each time. Whilst daclatasvir consistently delayed detachment in the **old Figure 4A** the data were under powered to reach significance. As a result, we have moved the **old Figure 4A** to the **new Supplementary Figure 3**. The **new Figure 4** now begins with the original separate, and suitably powered experiments using 6 different RDEB populations showing that our lead screen hits delay detachment in our in vitro assay of fibrosis.

(2) In the discussion a Figure 4H with AFM data is mentioned which is not included in the manuscript. This should be corrected. It would be interesting to compare AFM measurements of EB and non-EB matrices.

Reply: We thank the reviewer for catching the typo and have corrected the discussion to point out **Figure 4G (new 4F)**. We have also shown AFM measurements of RDEB and non-EB matrices in **Figure 1F**.

**References**

- Arbiser JL, Fine JD, Murrell D, Paller A, Connors S, Keough K, Marsh E, Folkman J (1998) Basic fibroblast growth factor: a missing link between collagen VII, increased collagenase, and squamous cell carcinoma in recessive dystrophic epidermolysis bullosa. *Mol Med* 4: 191-195
- Cao Q, Tartaglia G, Alexander M, Park PH, Poojan S, Farshchian M, Fuentes I, Chen M, McGrath JA, Palisson F *et al* (2022) Collagen VII maintains proteostasis in dermal fibroblasts by scaffolding TANGO1 cargo. *Matrix Biol* 111: 226-244
- Küttner V, Mack C, Gretzmeier C, Bruckner-Tuderman L, Dengjel J (2014) Loss of collagen VII is associated with reduced transglutaminase 2 abundance and activity. *J Invest Dermatol* 134: 2381-2389
- Küttner V, Mack C, Rigbolt KT, Kern JS, Schilling O, Busch H, Bruckner-Tuderman L, Dengjel J (2013) Global remodelling of cellular microenvironment due to loss of collagen VII. *Mol Syst Biol* 9: 657
- Ng YZ, Pourreyaon C, Salas-Alanis JC, Dayal JH, Cepeda-Valdes R, Yan W, Wright S, Chen M, Fine JD, Hogg FJ *et al* (2012) Fibroblast-derived dermal matrix drives development of aggressive cutaneous squamous cell carcinoma in patients with recessive dystrophic epidermolysis bullosa. *Cancer Res* 72: 3522-3534
- Nyström A, Velati D, Mittapalli VR, Fritsch A, Kern JS, Bruckner-Tuderman L (2013) Collagen VII plays a dual role in wound healing. *J Clin Invest* 123: 3498-3509

Strand DW, Liang YY, Yang F, Barron DA, Ressler SJ, Schauer IG, Feng XH, Rowley DR (2014) TGF- $\beta$  induction of FGF-2 expression in stromal cells requires integrated smad3 and MAPK pathways. *Am J Clin Exp Urol* 2: 239-248

Tölle RC, Dengjel J (2019) Effects of the Extracellular Matrix on the Proteome of Primary Skin Fibroblasts. *Methods Mol Biol* 1993: 193-204

Zakaria S, El-Sisi AE (2020) Daclatasvir and sofosbuvir mitigate hepatic fibrosis through downregulation of TNF- $\alpha$  / NF- $\kappa$ B signaling pathway. *Curr Mol Pharmacol*

9th Feb 2024

Dear Dr. South,

Thank you for the submission of your revised manuscript to EMBO Molecular Medicine. I am pleased to inform you that we will be able to accept your manuscript pending the following final amendments:

1) Figures:

- Remove all figures from the main manuscript file and leave only their legends placed after "References". All supplementary figures should be moved to Appendix file and renamed to Appendix Figure S1 etc. For more information on figure presentation please check "Author Guidelines". <https://www.embopress.org/page/journal/17574684/authorguide#datapresentationformat>
- We notice that Western blot images are of low resolution. Please display images in all figures in higher resolution.
- Figures R1 and R2 are meant for referees, is that correct? If this is the case and since these figures are also shown in PbP, please remove them in the next submission.

2) In the main manuscript file, please do the following:

- Please address all comments suggested by our data editors listed below:

o Figure legends:

1. Please note that a separate 'Data Information' section is required in the legends of figures 1a-h; 2b-f; 3d-g, k; 4a, c-d, f; 5a-g.
2. Please define the annotated p values \*\* in the legend of supplementary figure 4c, as appropriate.
3. Please indicate the statistical test used for data analysis in the legends of figures 5f-g.
4. Please note that in figures 1a-d, f-g; 2b-f; 4a-b, c, f; 5a-d, f-g; there is a mismatch between the annotated p values in the figure legend and the annotated p values in the figure file that should be corrected.
5. Please note that information related to n is missing in the legends of figures 1i; 3d-k, supplementary figure 2b.
6. Please note that n=2 in supplementary figure 3.
7. Although 'n' is provided, please describe the nature of entity for 'n' in the legends of figures 1a-i; 2f; 4a-f, supplementary figures 3; 4a-c; 5a, c.
8. Please note that the error bars are not defined in the legends of figures 3d-k, supplementary figure 2b.

- Limit keywords to max. 5.

- Add callouts for Figures 2F and 5G.

- Remove abbreviation list.

- In M&M, provide the statement that in addition to the WMA Declaration of Helsinki the experiments also conformed to the principles set out in the Department of Health and Human Services Belmont Report.

- In M&M, statistical paragraph should reflect all information that you have filled in the Authors Checklist, especially regarding randomization, blinding, replication.

- Please rename "Conflicts of interest" to "Disclosure Statement & Competing Interests". We updated our journal's competing interests policy in January 2022 and request authors to consider both actual and perceived competing interests. Please review the policy <https://www.embopress.org/competing-interests> and update your competing interests if necessary.

- Author contributions: Please remove it from the manuscript and specify author contributions in our submission system. CRediT has replaced the traditional author contributions section because it offers a systematic machine-readable author contributions format that allows for more effective research assessment. You are encouraged to use the free text boxes beneath each contributing author's name to add specific details on the author's contribution. More information is available in our guide to authors:

<https://www.embopress.org/page/journal/17574684/authorguide#authorshippinguidelines>

- 3) Data availability: Please make sure that all data deposited in public repositories are freely accessible upon publication.

- 4) Appendix: Please move all supplementary figures and tables with their legends to Appendix and upload it as a single pdf file with a table of content and page numbers on the first page. Rename supplementary figures and tables to Appendix Figure S1 etc. and Appendix Table S1 etc, also in the main manuscript text.

- 5) Funding: Please merge it with the "Acknowledgements".

- 6) The Paper Explained: Disease name should be written out in "Problem" section.

Problem: The primary objective of this controlled laboratory study was to identify compounds that could be repurposed for fibrosis prevention in recessive dystrophic epidermolysis bullosa (RDEB), which currently has no cure.

- 7) Synopsis: Every published paper now includes a "Synopsis" to further enhance discoverability. Synopses are displayed on the journal webpage and are freely accessible to all readers. They include separate synopsis image and synopsis text.

- Synopsis image: Please provide a striking image or visual abstract as a high-resolution jpeg file 550 px-wide x (250-400)-px high to illustrate your article.

- Synopsis text: Please provide a short standfirst (maximum of 300 characters, including space) as well as 2-5 one sentence bullet points that summarise the paper as a .doc file. Please write the bullet points to summarise the key NEW findings. They should be designed to be complementary to the abstract - i.e. not repeat the same text. We encourage inclusion of key acronyms and quantitative information (maximum of 30 words / bullet point). Please use the passive voice.

- Please check your synopsis text and image before submission with your revised manuscript. Please be aware that in the proof

stage minor corrections only are allowed (e.g., typos).

8) Source data: Please upload one file per figure.

9) For more information: This space should be used to list relevant web links for further consultation by our readers. Could you identify some relevant ones and provide such information as well? Some examples are patient associations, relevant databases, OMIM/proteins/genes links, author's websites, etc...

10) As part of the EMBO Publications transparent editorial process initiative (see our Editorial at <http://embomolmed.embopress.org/content/2/9/329>), EMBO Molecular Medicine will publish online a Review Process File (RPF) to accompany accepted manuscripts. This file will be published in conjunction with your paper and will include the anonymous referee reports, your point-by-point response and all pertinent correspondence relating to the manuscript. Let us know whether you agree with the publication of the RPF and as here, if you want to remove or not any figures from it prior to publication. Please note that the Authors checklist will be published at the end of the RPF.

11) Please provide a point-by-point letter INCLUDING my comments as well as the reviewer's reports and your detailed responses (as Word file).

I look forward to reading a new revised version of your manuscript as soon as possible.

Yours sincerely,

Zeljko Durdevic

Zeljko Durdevic  
Editor  
EMBO Molecular Medicine

\*\*\* Instructions to submit your revised manuscript \*\*\*

\*\*\* PLEASE NOTE \*\*\* As part of the EMBO Publications transparent editorial process initiative (see our Editorial at <https://www.embopress.org/doi/pdf/10.1002/emmm.201000094>), EMBO Molecular Medicine will publish online a Review Process File to accompany accepted manuscripts.

In the event of acceptance, this file will be published in conjunction with your paper and will include the anonymous referee reports, your point-by-point response and all pertinent correspondence relating to the manuscript. If you do NOT want this file to be published, please inform the editorial office at [contact@embomolmed.org](mailto:contact@embomolmed.org).

When submitting your revised manuscript, please include:

1) a .docx formatted version of the manuscript text (including Figure legends and tables)

2) Separate figure files\*

3) supplemental information as Expanded View and/or Appendix. Please carefully check the authors guidelines for formatting Expanded view and Appendix figures and tables at <https://www.embopress.org/page/journal/17574684/authorguide#expandedview>

4) a letter INCLUDING the reviewer's reports and your detailed responses to their comments (as Word file).

5) The paper explained: EMBO Molecular Medicine articles are accompanied by a summary of the articles to emphasize the major findings in the paper and their medical implications for the non-specialist reader. Please provide a draft summary of your article highlighting

- the medical issue you are addressing,
- the results obtained and
- their clinical impact.

This may be edited to ensure that readers understand the significance and context of the research.

Please refer to any of our published articles for an example.

6) For more information: There is space at the end of each article to list relevant web links for further consultation by our readers. Could you identify some relevant ones and provide such information as well? Some examples are patient associations, relevant databases, OMIM/proteins/genes links, author's websites, etc...

7) Author contributions: the contribution of every author must be detailed in a separate section.

8) EMBO Molecular Medicine now requires a complete author checklist (<https://www.embopress.org/page/journal/17574684/authorguide>) to be submitted with all revised manuscripts. Please use the checklist as guideline for the sort of information we need WITHIN the manuscript. The checklist should only be filled with page numbers where the information can be found. This is particularly important for animal reporting, antibody dilutions (missing) and exact values and n that should be indicated instead of a range.

9) Every published paper now includes a 'Synopsis' to further enhance discoverability. Synopses are displayed on the journal webpage and are freely accessible to all readers. They include a short stand first (maximum of 300 characters, including space) as well as 2-5 one sentence bullet points that summarise the paper. Please write the bullet points to summarise the key NEW findings. They should be designed to be complementary to the abstract - i.e. not repeat the same text. We encourage inclusion of key acronyms and quantitative information (maximum of 30 words / bullet point). Please use the passive voice. Please attach these in a separate file or send them by email, we will incorporate them accordingly.

You are also welcome to suggest a striking image or visual abstract to illustrate your article. If you do please provide a jpeg file 550 px-wide x 300-800px high.

10) A Conflict of Interest statement should be provided in the main text

11) Please note that we now mandate that all corresponding authors list an ORCID digital identifier. This takes <90 seconds to complete. We encourage all authors to supply an ORCID identifier, which will be linked to their name for unambiguous name identification.

Currently, our records indicate that the ORCID for your account is 0000-0001-7650-0835.

Please click the link below to modify this ORCID:

Link Not Available

\*Additional important information regarding Figures

Each figure should be given in a separate file and should have the following resolution:

Graphs 800-1,200 DPI

Photos 400-800 DPI

Colour (only CMYK) 300-400 DPI"

Figures are not edited by the production team. All lettering should be the same size and style; figure panels should be indicated by capital letters (A, B, C etc). Gridlines are not allowed except for log plots. Figures should be numbered in the order of their appearance in the text with Arabic numerals. Each Figure must have a separate legend and a caption is needed for each panel.

\*Additional important information regarding figures and illustrations can be found at

<https://bit.ly/EMBOPressFigurePreparationGuideline>. See also figure legend preparation guidelines:

<https://www.embopress.org/page/journal/17574684/authorguide#figureformat>

\*\*\*\*\* Reviewer's comments \*\*\*\*\*

Referee #1 (Remarks for Author):

The authors have addressed my comments appropriately and consistently. The manuscript is now suitable for publication.

Referee #3 (Remarks for Author):

The authors addressed all my concerns. I congratulate them to an interesting paper and hope for swift translation of the findings.



The authors addressed the remaining editorial issues.

19th Feb 2024

Dear Dr. South,

We are pleased to inform you that your manuscript is accepted for publication and is now being sent to our publisher to be included in the next available issue of EMBO Molecular Medicine.

Your manuscript will be processed for publication by EMBO Press. It will be copy edited and you will receive page proofs prior to publication. Please note that you will be contacted by Springer Nature Author Services to complete licensing and payment information.

You may qualify for financial assistance for your publication charges - either via a Springer Nature fully open access agreement or an EMBO initiative. Check your eligibility: <https://www.embopress.org/page/journal/17574684/authorguide#chargesguide>

Should you be planning a Press Release on your article, please get in contact with [embo\\_production@springernature.com](mailto:embo_production@springernature.com) as early as possible in order to coordinate publication and release dates.

If you have any questions, please do not hesitate to contact the Editorial Office. Thank you for your contribution to EMBO Molecular Medicine.

Yours sincerely,  
Zeljko Durdevic

Zeljko Durdevic  
Editor  
EMBO Molecular Medicine

-----

>>> Please note that it is EMBO Molecular Medicine policy for the transcript of the editorial process (containing referee reports and your response letter) to be published as an online supplement to each paper. If you do NOT want this, you will need to inform the Editorial Office via email immediately. More information is available here: [https://www.embopress.org/transparent-process#Review\\_Process](https://www.embopress.org/transparent-process#Review_Process)

## EMBO Press Author Checklist

|                                               |
|-----------------------------------------------|
| Corresponding Author Name: Grace Tartaglia    |
| Journal Submitted to: EMBO Molecular Medicine |
| Manuscript Number: EMM-2023-18774             |

### USEFUL LINKS FOR COMPLETING THIS FORM

- [The EMBO Journal - Author Guidelines](#)
- [EMBO Reports - Author Guidelines](#)
- [Molecular Systems Biology - Author Guidelines](#)
- [EMBO Molecular Medicine - Author Guidelines](#)

### Reporting Checklist for Life Science Articles (updated January)

This checklist is adapted from Materials Design Analysis Reporting (MDAR) Checklist for Authors. MDAR establishes a minimum set of requirements in transparent reporting in the life sciences (see Statement of Task: [10.31222/osf.io/9sm4x](https://doi.org/10.31222/osf.io/9sm4x)). Please follow the journal's guidelines in preparing your

**Please note that a copy of this checklist will be published alongside your article.**

### Abridged guidelines for figures

#### 1. Data

The data shown in figures should satisfy the following conditions:

- the data were obtained and processed according to the field's best practice and are presented to reflect the results of the experiments in an accurate and unbiased manner.
- ideally, figure panels should include only measurements that are directly comparable to each other and obtained with the same assay.
- plots include clearly labeled error bars for independent experiments and sample sizes. Unless justified, error bars should not be shown for technical
- if  $n < 5$ , the individual data points from each experiment should be plotted. Any statistical test employed should be justified.
- Source Data should be included to report the data underlying figures according to the guidelines set out in the authorship guidelines on Data

#### 2. Captions

Each figure caption should contain the following information, for each panel where they are relevant:

- a specification of the experimental system investigated (eg cell line, species name).
- the assay(s) and method(s) used to carry out the reported observations and measurements.
- an explicit mention of the biological and chemical entity(ies) that are being measured.
- an explicit mention of the biological and chemical entity(ies) that are altered/ varied/ perturbed in a controlled manner.
- the exact sample size (n) for each experimental group/condition, given as a number, not a range;
- a description of the sample collection allowing the reader to understand whether the samples represent technical or biological replicates (including how many animals, litters, cultures, etc.).
- a statement of how many times the experiment shown was independently replicated in the laboratory.
- definitions of statistical methods and measures:
  - common tests, such as t-test (please specify whether paired vs. unpaired), simple  $\chi^2$  tests, Wilcoxon and Mann-Whitney tests, can be unambiguously identified by name only, but more complex techniques should be described in the methods section;
  - are tests one-sided or two-sided?
  - are there adjustments for multiple comparisons?
  - exact statistical test results, e.g., P values = x but not P values < x;
  - definition of 'center values' as median or average;
  - definition of error bars as s.d. or s.e.m.

**Please complete ALL of the questions below.**  
Select "Not Applicable" only when the requested information is not relevant for your study.

### Materials

| Newly Created Materials                                                                                                                                                                                                     | Information included in the manuscript? | In which section is the information available?<br>(Reagents and Tools Table, Materials and Methods, Figures, Data Availability Section) |
|-----------------------------------------------------------------------------------------------------------------------------------------------------------------------------------------------------------------------------|-----------------------------------------|-----------------------------------------------------------------------------------------------------------------------------------------|
| New materials and reagents need to be available; do any restrictions apply?                                                                                                                                                 | Not Applicable                          |                                                                                                                                         |
| Antibodies                                                                                                                                                                                                                  | Information included in the manuscript? | In which section is the information available?<br>(Reagents and Tools Table, Materials and Methods, Figures, Data Availability Section) |
| For <b>antibodies</b> provide the following information:<br>- Commercial antibodies: RRID (if possible) or supplier name, catalogue number and/or clone number<br>- Non-commercial: RRID or citation                        | Yes                                     | Materials and Methods                                                                                                                   |
| DNA and RNA sequences                                                                                                                                                                                                       | Information included in the manuscript? | In which section is the information available?<br>(Reagents and Tools Table, Materials and Methods, Figures, Data Availability Section) |
| Short novel DNA or RNA including primers, probes: provide the sequences.                                                                                                                                                    | Yes                                     | Materials and Methods                                                                                                                   |
| Cell materials                                                                                                                                                                                                              | Information included in the manuscript? | In which section is the information available?<br>(Reagents and Tools Table, Materials and Methods, Figures, Data Availability Section) |
| <b>Cell lines:</b> Provide species information, strain. Provide accession number in repository <b>OR</b> supplier name, catalog number, clone number, and <b>OR</b> RRID.                                                   | Not Applicable                          |                                                                                                                                         |
| <b>Primary cultures:</b> Provide species, strain, sex of origin, genetic modification status.                                                                                                                               | Yes                                     | Supplemental Table 3                                                                                                                    |
| Report if the cell lines were recently <b>authenticated</b> (e.g., by STR profiling) and tested for mycoplasma contamination.                                                                                               | Not Applicable                          |                                                                                                                                         |
| Experimental animals                                                                                                                                                                                                        | Information included in the manuscript? | In which section is the information available?<br>(Reagents and Tools Table, Materials and Methods, Figures, Data Availability Section) |
| <b>Laboratory animals or Model organisms:</b> Provide species, strain, sex, age, genetic modification status. Provide accession number in repository <b>OR</b> supplier name, catalog number, clone number, <b>OR</b> RRID. | Yes                                     | Materials and Methods                                                                                                                   |
| <b>Animal observed in or captured from the field:</b> Provide species, sex, and age where possible.                                                                                                                         | Not Applicable                          |                                                                                                                                         |
| Please detail <b>housing and husbandry conditions</b> .                                                                                                                                                                     | Yes                                     | Materials and Methods                                                                                                                   |
| Plants and microbes                                                                                                                                                                                                         | Information included in the manuscript? | In which section is the information available?<br>(Reagents and Tools Table, Materials and Methods, Figures, Data Availability Section) |
| <b>Plants:</b> provide species and strain, ecotype and cultivar where relevant, unique accession number if available, and source (including location for collected wild specimens).                                         | Not Applicable                          |                                                                                                                                         |
| <b>Microbes:</b> provide species and strain, unique accession number if available, and source.                                                                                                                              | Not Applicable                          |                                                                                                                                         |
| Human research participants                                                                                                                                                                                                 | Information included in the manuscript? | In which section is the information available?<br>(Reagents and Tools Table, Materials and Methods, Figures, Data Availability Section) |
| If collected and within the bounds of privacy constraints report on age, sex and gender or ethnicity for all study participants.                                                                                            | Not Applicable                          |                                                                                                                                         |
| Core facilities                                                                                                                                                                                                             | Information included in the manuscript? | In which section is the information available?<br>(Reagents and Tools Table, Materials and Methods, Figures, Data Availability Section) |
| If your work benefited from core facilities, was their service mentioned in the acknowledgments section?                                                                                                                    | Yes                                     | Acknowledgments                                                                                                                         |

### Design

| <b>Study protocol</b>                                                                                                                                                                                                                                                                                                                      | <b>Information included in the manuscript?</b> | <b>In which section is the information available?</b><br>(Reagents and Tools Table, Materials and Methods, Figures, Data Availability Section) |
|--------------------------------------------------------------------------------------------------------------------------------------------------------------------------------------------------------------------------------------------------------------------------------------------------------------------------------------------|------------------------------------------------|------------------------------------------------------------------------------------------------------------------------------------------------|
| If study protocol has been <b>pre-registered</b> , provide DOI in the manuscript. For clinical trials, provide the trial registration number OR cite DOI.                                                                                                                                                                                  | Not Applicable                                 |                                                                                                                                                |
| Report the <b>clinical trial registration number</b> (at ClinicalTrials.gov or equivalent), where applicable.                                                                                                                                                                                                                              | Not Applicable                                 |                                                                                                                                                |
| <b>Laboratory protocol</b>                                                                                                                                                                                                                                                                                                                 | <b>Information included in the manuscript?</b> | <b>In which section is the information available?</b><br>(Reagents and Tools Table, Materials and Methods, Figures, Data Availability Section) |
| Provide DOI OR other citation details if <b>external detailed step-by-step protocols</b> are available.                                                                                                                                                                                                                                    | Not Applicable                                 |                                                                                                                                                |
| <b>Experimental study design and statistics</b>                                                                                                                                                                                                                                                                                            | <b>Information included in the manuscript?</b> | <b>In which section is the information available?</b><br>(Reagents and Tools Table, Materials and Methods, Figures, Data Availability Section) |
| Include a statement about <b>sample size</b> estimate even if no statistical methods were used.                                                                                                                                                                                                                                            | Yes                                            | Figure legends                                                                                                                                 |
| Were any steps taken to minimize the effects of subjective bias when allocating animals/samples to treatment (e.g. <b>randomization procedure</b> )? If yes, have they been described?                                                                                                                                                     | Not Applicable                                 |                                                                                                                                                |
| Include a statement about <b>blinding</b> even if no blinding was done.                                                                                                                                                                                                                                                                    | Yes                                            | Materials and Methods                                                                                                                          |
| Describe <b>inclusion/exclusion criteria</b> if samples or animals were excluded from the analysis. Were the criteria pre-established?                                                                                                                                                                                                     | Not Applicable                                 |                                                                                                                                                |
| If sample or data points were omitted from analysis, report if this was due to <b>attrition or intentional exclusion</b> and provide justification.                                                                                                                                                                                        | Not Applicable                                 |                                                                                                                                                |
| For every figure, are <b>statistical tests</b> justified as appropriate? Do the data meet the assumptions of the tests (e.g., normal distribution)? Describe any methods used to assess it. Is there an estimate of variation within each group of data? Is the variance similar between the groups that are being statistically compared? | Yes                                            | Materials and Methods                                                                                                                          |
| <b>Sample definition and in-laboratory replication</b>                                                                                                                                                                                                                                                                                     | <b>Information included in the manuscript?</b> | <b>In which section is the information available?</b><br>(Reagents and Tools Table, Materials and Methods, Figures, Data Availability Section) |
| In the figure legends: state number of times the experiment was <b>replicated in laboratory</b> .                                                                                                                                                                                                                                          | Yes                                            | Figure Legends                                                                                                                                 |
| In the figure legends: define whether data describe <b>technical or biological replicates</b> .                                                                                                                                                                                                                                            | Yes                                            | Supplementary Table 3                                                                                                                          |

#### Ethics

| <b>Ethics</b>                                                                                                                                                                                                                                                                                            | <b>Information included in the manuscript?</b> | <b>In which section is the information available?</b><br>(Reagents and Tools Table, Materials and Methods, Figures, Data Availability Section) |
|----------------------------------------------------------------------------------------------------------------------------------------------------------------------------------------------------------------------------------------------------------------------------------------------------------|------------------------------------------------|------------------------------------------------------------------------------------------------------------------------------------------------|
| Studies involving <b>human participants</b> : State details of <b>authority granting ethics approval</b> (IRB or equivalent committee(s)), provide reference number for approval.                                                                                                                        | Not Applicable                                 |                                                                                                                                                |
| Studies involving <b>human participants</b> : Include a statement confirming that <b>informed consent</b> was obtained from all subjects and that the experiments conformed to the principles set out in the WMA Declaration of Helsinki and the Department of Health and Human Services Belmont Report. | Yes                                            | Materials and Methods                                                                                                                          |
| Studies involving <b>human participants</b> : For publication of <b>patient photos</b> , include a statement confirming that consent to publish was obtained.                                                                                                                                            | Not Applicable                                 |                                                                                                                                                |
| Studies involving experimental <b>animals</b> : State details of <b>authority granting ethics approval</b> (IRB or equivalent committee(s)), provide reference number for approval. Include a statement of compliance with ethical regulations.                                                          | Yes                                            | Materials and Methods                                                                                                                          |
| Studies involving <b>specimen and field samples</b> : State if relevant <b>permits</b> obtained, provide details of authority approving study; if none were required, explain why.                                                                                                                       | Not Applicable                                 |                                                                                                                                                |
| <b>Dual Use Research of Concern (DURC)</b>                                                                                                                                                                                                                                                               | <b>Information included in the manuscript?</b> | <b>In which section is the information available?</b><br>(Reagents and Tools Table, Materials and Methods, Figures, Data Availability Section) |
| Could your study fall under dual use research restrictions? Please check biosecurity documents and list of <b>select agents and toxins</b> (CDC): <a href="https://www.selectagents.gov/sat/list.htm">https://www.selectagents.gov/sat/list.htm</a>                                                      | Not Applicable                                 |                                                                                                                                                |
| If you used a select agent, is the security level of the lab appropriate and reported in the manuscript?                                                                                                                                                                                                 | Not Applicable                                 |                                                                                                                                                |
| If a study is subject to dual use research of concern regulations, is the name of the <b>authority granting approval and reference number</b> for the regulatory approval provided in the manuscript?                                                                                                    | Not Applicable                                 |                                                                                                                                                |

#### Reporting

The MDAR framework recommends adoption of discipline-specific guidelines, established and endorsed through community initiatives. Journals have their own policy about requiring specific guidelines and recommendations to complement MDAR.

| <b>Adherence to community standards</b>                                                                                                                                                                                                                                                                                              | <b>Information included in the manuscript?</b> | <b>In which section is the information available?</b><br>(Reagents and Tools Table, Materials and Methods, Figures, Data Availability Section) |
|--------------------------------------------------------------------------------------------------------------------------------------------------------------------------------------------------------------------------------------------------------------------------------------------------------------------------------------|------------------------------------------------|------------------------------------------------------------------------------------------------------------------------------------------------|
| State if relevant guidelines or checklists (e.g., ICMJE, MIBBI, ARRIVE, PRISMA) have been followed or provided.                                                                                                                                                                                                                      | Not Applicable                                 |                                                                                                                                                |
| For <b>tumor marker prognostic studies</b> , we recommend that you follow the <b>REMARK</b> reporting guidelines (see link list at top right). See author guidelines, under 'Reporting Guidelines'. Please confirm you have followed these guidelines.                                                                               | Not Applicable                                 |                                                                                                                                                |
| For <b>phase II and III randomized controlled trials</b> , please refer to the <b>CONSORT</b> flow diagram (see link list at top right) and submit the <b>CONSORT</b> checklist (see link list at top right) with your submission. See author guidelines, under 'Reporting Guidelines'. Please confirm you have submitted this list. | Not Applicable                                 |                                                                                                                                                |

#### Data Availability

| <b>Data availability</b>                                                                                                                                                                          | <b>Information included in the manuscript?</b> | <b>In which section is the information available?</b><br>(Reagents and Tools Table, Materials and Methods, Figures, Data Availability Section)                        |
|---------------------------------------------------------------------------------------------------------------------------------------------------------------------------------------------------|------------------------------------------------|-----------------------------------------------------------------------------------------------------------------------------------------------------------------------|
| Have <b>primary datasets</b> been deposited according to the journal's guidelines (see 'Data Deposition' section) and the respective accession numbers provided in the Data Availability Section? | Yes                                            | Materials and Methods (accession number pending, but we received approval from the editor to submit first and send the accession number when NCBI finishes approving) |
| Were <b>human clinical and genomic datasets</b> deposited in a public access-controlled repository in accordance to ethical obligations to the patients and to the applicable consent agreement?  | Not Applicable                                 |                                                                                                                                                                       |
| Are <b>computational models</b> that are central and integral to a study available without restrictions in a machine-readable form? Were the relevant accession numbers or links provided?        | Not Applicable                                 |                                                                                                                                                                       |
| If publicly available data were reused, provide the respective <b>data citations in the reference list</b> .                                                                                      | Not Applicable                                 |                                                                                                                                                                       |
